# Supplementary material for: Syntheses, structures and magnetic properties of macrocyclic Schiff base-supported homodinuclear lanthanide complexes
Source: Royal Society of Chemistry journal article supplement (doi:10.1039/c8dt02243g), 2018-01-01
Supplement: c8dt02243g1.pdf [file c8dt02243g1.pdf]

## Electronic Supplementary Information

### **Syntheses, structures and magnetic properties of macrocyclic Schiff base-supported homodinuclear lanthanide complexes†**

Feng Gao,<sup>\*a</sup> Yi-Quan Zhang,<sup>\*b</sup> Wang Sun,<sup>a</sup> Huan Liu,<sup>a</sup> and Xiaoyu Chen<sup>\*c</sup>

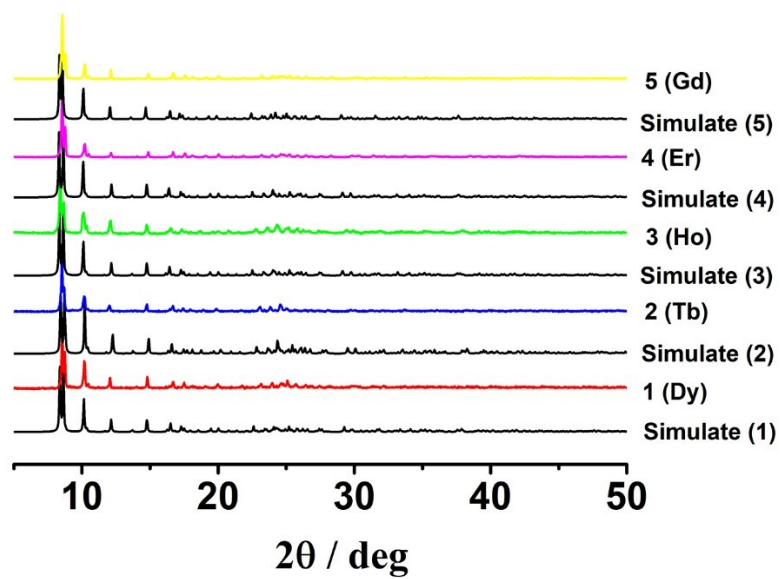

**Fig. S1** Experimental and simulated PXRD patterns of complexes 1–5.

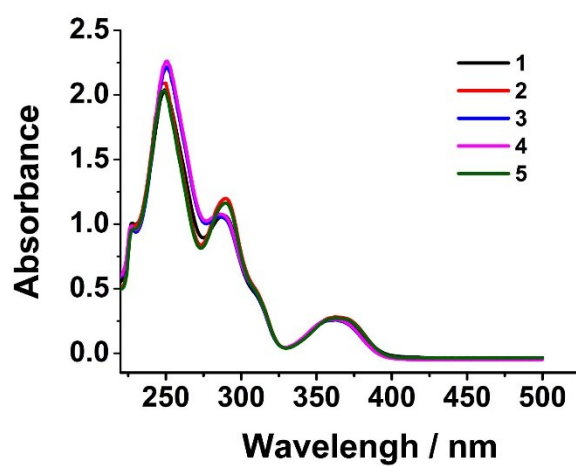

**Fig. S2** UV-Vis absorption spectra for complexes 1–5 in dichloromethane ( $c = 6 \times 10^{-6}$  M).

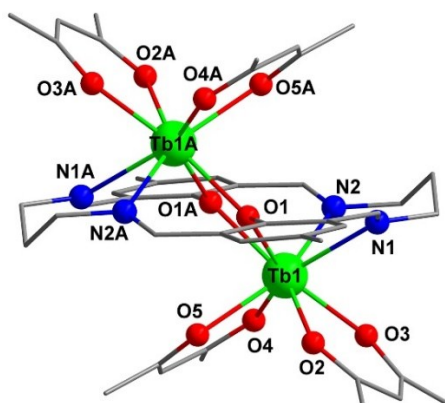

**Fig. S3** Molecular structure of complex 2 with hydrogen atoms and solvent molecules omitted for clarity.

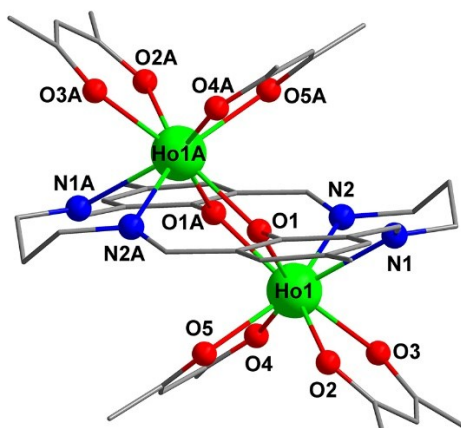

**Fig. S4** Molecular structure of complex **3** with hydrogen atoms omitted for clarity.

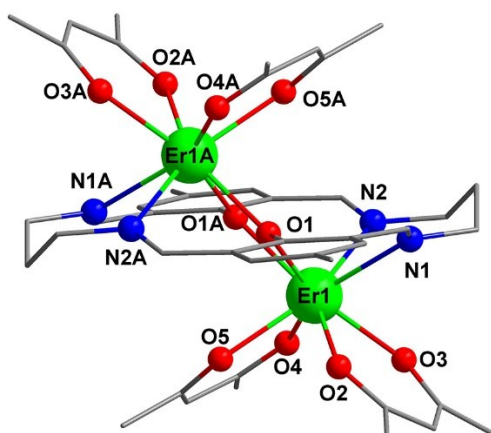

**Fig. S5** Molecular structure of complex **4** with hydrogen atoms omitted for clarity.

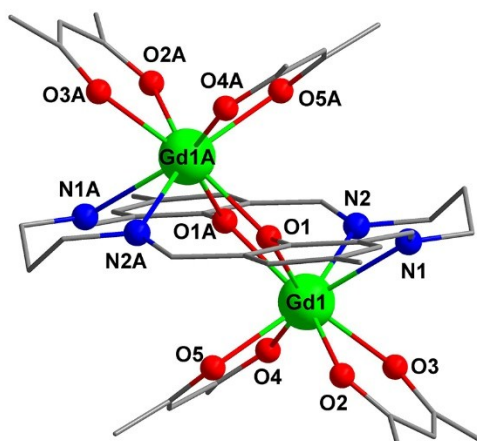

**Fig. S6** Molecular structure of complex **5** with hydrogen atoms omitted for clarity.

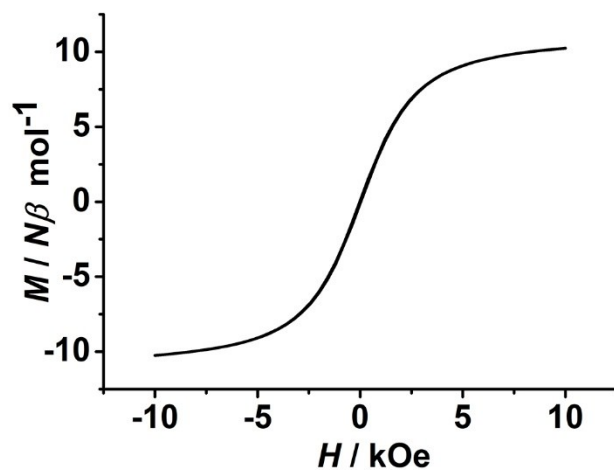

**Fig. S7** Hysteresis loop for complex **1** at 2.0 K with a sweeping rate of 100 Oe s<sup>-1</sup>.

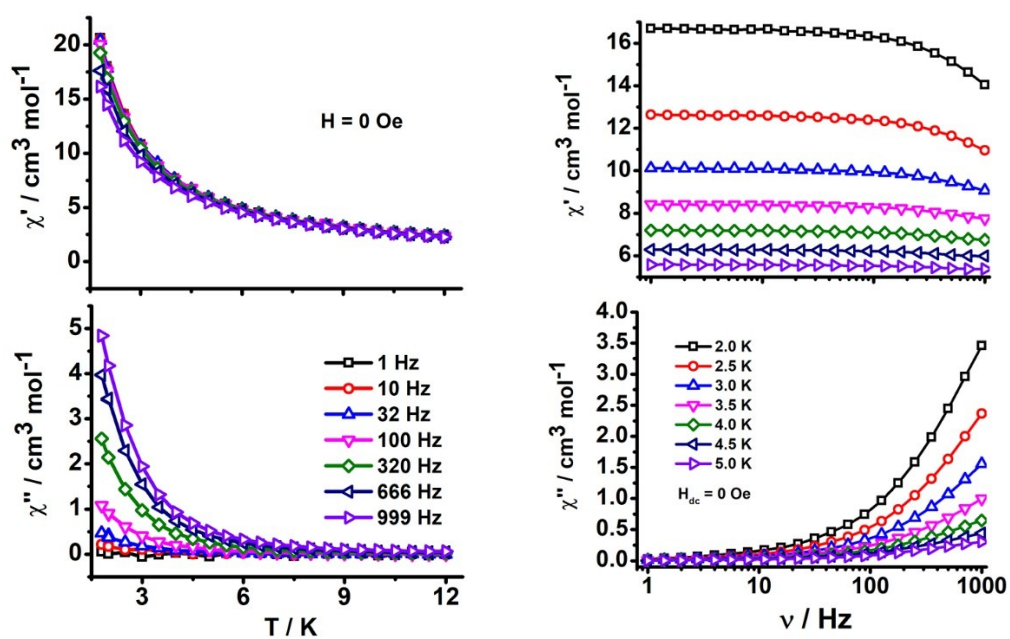

**Fig. S8** Temperature- and frequency- dependent in-phase ( $\chi'$ ) and out-of-phase ( $\chi''$ ) ac susceptibilities data for complex **1** under  $H_{dc} = 0$  Oe.

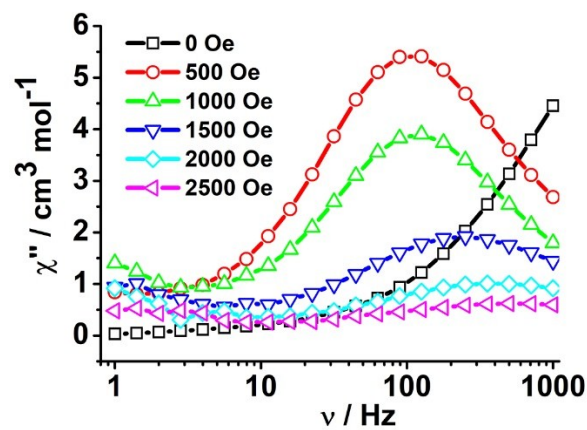

**Fig. S9** Frequency-dependence out-of-phase ( $\chi''$ ) ac susceptibility for complex **1** at 2.5 K under different external fields.

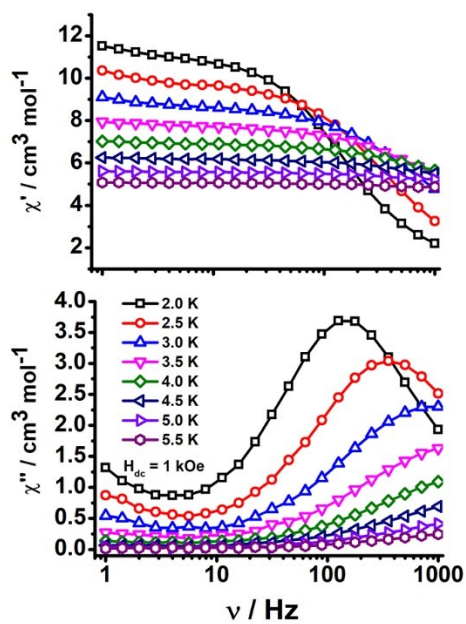

**Fig. S10** Frequency-dependent in-phase ( $\chi'$ ) and out-of-phase ( $\chi''$ ) ac susceptibilities of complex **1** from 2.0 to 5.5 K under  $H_{dc} = 1$  kOe.

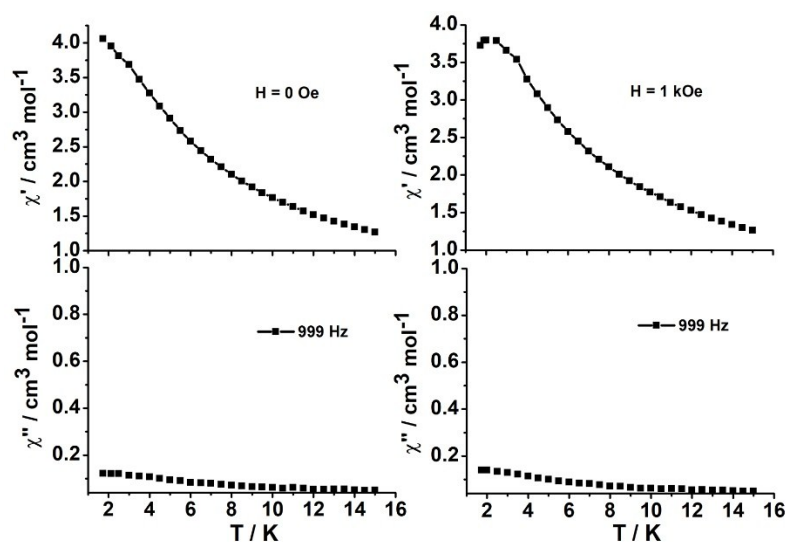

**Fig. S11** Temperature-dependent in-phase ( $\chi'$ ) and out-of-phase ( $\chi''$ ) ac susceptibilities of complex **2** at the frequency of 999 Hz under  $H_{dc} = 0$  Oe (left) and  $H_{dc} = 1$  kOe (right).

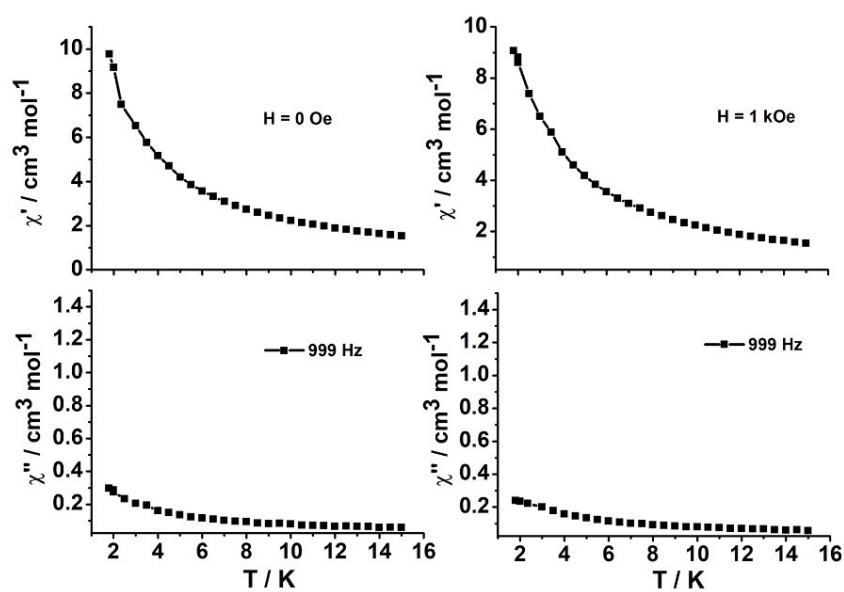

**Fig. S12** Temperature-dependent in-phase ( $\chi'$ ) and out-of-phase ( $\chi''$ ) ac susceptibilities of complex **3** at the frequency of 999 Hz under  $H_{dc} = 0$  Oe (left) and  $H_{dc} = 1$  kOe (right).

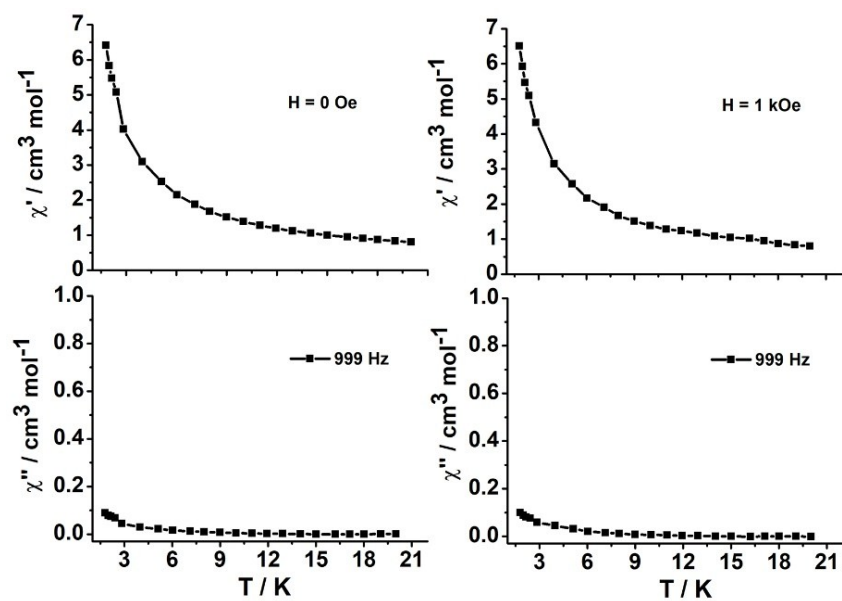

**Fig. S13** Temperature-dependent in-phase ( $\chi'$ ) and out-of-phase ( $\chi''$ ) ac susceptibilities of complex **4** at the frequency of 999 Hz under  $H_{\text{dc}} = 0$  Oe (left) and  $H_{\text{dc}} = 1$  kOe (right).

**Table S1** Selected bond lengths (Å) and angles (°) for complexes **2–5**.

|                                 | <b>2</b>  | <b>3</b>   | <b>4</b>   | <b>5</b>   |
|---------------------------------|-----------|------------|------------|------------|
| Ln(1)-O(1)                      | 2.335(2)  | 2.321(3)   | 2.315(3)   | 2.358(3)   |
| Ln(1)-O(2)                      | 2.330(2)  | 2.319(3)   | 2.312(3)   | 2.357(3)   |
| Ln(1)-O(3)                      | 2.333(2)  | 2.321(3)   | 2.311(3)   | 2.357(3)   |
| Ln(1)-O(4)                      | 2.341(2)  | 2.340(3)   | 2.326(3)   | 2.373(3)   |
| Ln(1)-O(5)                      | 2.337(2)  | 2.312(3)   | 2.297(3)   | 2.342(3)   |
| Ln(1)-O(1)#1 <sup>b</sup>       | 2.370(2)  | 2.357(3)   | 2.353(3)   | 2.379(3)   |
| Ln(1)-Ln(1)#1 <sup>b</sup>      | 3.895(4)  | 3.886(7)   | 3.875(7)   | 3.937(7)   |
| Ln(1)-N(1)                      | 2.601(3)  | 2.590(4)   | 2.581(4)   | 2.627(3)   |
| Ln(1)-N(2)                      | 2.560(3)  | 2.540(4)   | 2.545(4)   | 2.571(4)   |
| O(2)-Ln(1)-O(3)                 | 72.90(8)  | 73.10(11)  | 73.52(13)  | 72.40(12)  |
| O(4)-Ln(1)-O(5)                 | 73.36(7)  | 73.43(10)  | 73.51(12)  | 72.55(10)  |
| O(3)-Ln(1)-O(4)                 | 72.01(8)  | 72.21(10)  | 72.15(11)  | 72.69(10)  |
| O(2)-Ln(1)-O(5)                 | 73.82(8)  | 73.47(10)  | 73.30(11)  | 74.27(10)  |
| N(1)-Ln(1)-N(2)                 | 75.52(9)  | 75.37(12)  | 75.48(13)  | 75.09(12)  |
| O(1)-Ln(1)-O(1)#1 <sup>b</sup>  | 68.23(8)  | 67.67(11)  | 67.74(12)  | 67.56(11)  |
| O(1)-Ln(1)-N(1)                 | 70.80(8)  | 71.02(10)  | 71.34(11)  | 69.96(10)  |
| Ln(1)-O(1)-Ln(1)#1 <sup>b</sup> | 111.77(8) | 112.33(11) | 112.25(12) | 112.44(11) |
| O(1)-Ln(1)-Ln(1)#1 <sup>b</sup> | 34.40(5)  | 34.13(7)   | 34.19(8)   | 33.95(7)   |

<sup>b</sup> Symmetry transformations used to generate equivalent atoms: #1 -x, -y, -z.



**Table S2** Summary of structural parameters for complexes **1–5**.

|                                                                           | <b>1</b> | <b>2</b> | <b>3</b> | <b>4</b> | <b>5</b> |
|---------------------------------------------------------------------------|----------|----------|----------|----------|----------|
| Average Ln-N bond length (Å)                                              | 2.575    | 2.581    | 2.565    | 2.563    | 2.599    |
| Average Ln-O bond length (Å)                                              | 2.329    | 2.339    | 2.326    | 2.316    | 2.359    |
| Ln1 to O2-O3-O4-O5 plane center distance (Å)                              | 1.257(5) | 1.263(7) | 1.255(5) | 1.247(6) | 1.276(7) |
| Ln1 to N1-N2-O1-O1A plane center distance (Å)                             | 1.388(7) | 1.386(6) | 1.376(6) | 1.366(7) | 1.418(6) |
| Dihedral angle between O2-O3-O4-O5 and N1-N2-O1-O1A planes (°)            | 1.71(9)  | 1.92(9)  | 1.89(10) | 1.62(9)  | 1.85(10) |
| Shortest intermolecular Ln <sup>3+</sup> ...Ln <sup>3+</sup> distance (Å) | 8.593(3) | 8.497(5) | 8.603(5) | 8.606(3) | 8.636(3) |
| Intramolecular Ln <sup>3+</sup> ...Ln <sup>3+</sup> distance (Å)          | 3.886(5) | 3.895(4) | 3.886(7) | 3.875(7) | 3.937(7) |

**Table S3** Parameters obtained by continuous shape measurement (CShM) method for study of central Ln(III) coordination sphere of complexes **1–5**. (The S values indicate the proximity to the selected ideal polyhedron, S = 0 corresponds to the non-distorted polyhedron).

|                                              | <b>1-S<sub>Dy</sub></b> | <b>2-S<sub>Tb</sub></b> | <b>3-S<sub>Ho</sub></b> | <b>4-S<sub>Er</sub></b> | <b>5-S<sub>Gd</sub></b> |
|----------------------------------------------|-------------------------|-------------------------|-------------------------|-------------------------|-------------------------|
| Cube (CU, $O_h$ )                            | 9.711                   | 9.640                   | 9.681                   | 9.790                   | 9.445                   |
| Square antiprism (SAP, $D_{4d}$ )            | 0.510                   | 0.476                   | 0.482                   | 0.461                   | 0.551                   |
| Triangular dodecahedron (TDD, $D_{2d}$ )     | 2.316                   | 2.347                   | 2.316                   | 2.328                   | 2.239                   |
| Biaugmented trigonal prism (BTPR, $C_{2v}$ ) | 2.142                   | 2.190                   | 2.130                   | 2.072                   | 2.273                   |

**Table S4** Relaxation fitting parameters of the Cole-Cole plots based on the extended Debye model for complex **1** under  $H_{\text{dc}} = 1$  kOe in the temperature range of 2.0–5.5 K.

| T / K | $\chi_s / \text{cm}^3 \text{mol}^{-1}$ | $\chi_T / \text{cm}^3 \text{mol}^{-1}$ | $\ln(\tau_1 / \text{s})$ | $\alpha_1$ | $\ln(\tau_2 / \text{s})$ | $\alpha_2$ | $\beta$ |
|-------|----------------------------------------|----------------------------------------|--------------------------|------------|--------------------------|------------|---------|
| 2.0   | 1.207                                  | 15.527                                 | −6.890                   | 0.19       | −0.624                   | 0.08       | 0.31    |
| 2.5   | 1.017                                  | 11.539                                 | −7.743                   | 0.23       | −1.499                   | 0.01       | 0.15    |
| 3.0   | 1.408                                  | 10.842                                 | −8.542                   | 0.28       | −1.545                   | 0.33       | 0.35    |
| 3.5   | 1.937                                  | 8.346                                  | −9.176                   | 0.33       | −1.485                   | 0.18       | 0.08    |
| 4.0   | 2.335                                  | 7.192                                  | −9.794                   | 0.35       | −1.619                   | 0.03       | 0.05    |
| 4.5   | 2.274                                  | 6.301                                  | −11.151                  | 0.41       | −2.013                   | 0.170      | 0.02    |
| 5.0   | 2.557                                  | 5.631                                  | −12.792                  | 0.43       | −2.071                   | 0.33       | 0.01    |
| 5.5   | 2.483                                  | 5.543                                  | −14.557                  | 0.45       | −2.152                   | 0.30       | 0.05    |

### Computational details

Binuclear complex **1** has one inversion center, thus only one type of Dy<sup>III</sup> fragment was calculated. CASSCF calculations on individual Dy<sup>III</sup> fragment of the model structure extracted from the compound on the basis of single-crystal X-ray determined geometry have been carried out with MOLCAS 8.2 program package. Individual Dy<sup>III</sup> fragment was calculated keeping the experimentally determined structure of the corresponding compound while replacing the neighboring Dy<sup>III</sup> ion by diamagnetic Lu<sup>III</sup>.

The basis sets for all atoms are atomic natural orbitals from the MOLCAS ANO-RCC library: ANO-RCC-VTZP for Dy<sup>III</sup> ion; VTZ for close O and N; ANO-RCC-VTZP VDZ for distant atoms. The calculations employed the second order Douglas-Kroll-Hess Hamiltonian, where scalar relativistic contractions were taken into account in the basis set and the spin-orbit couplings were handled separately in the restricted active space state interaction (RASSI-SO) procedure. For individual Dy<sup>III</sup> fragment, active electrons in 7 active spaces include all *f* electrons (CAS(9 in 7)) in the CASSCF calculation. To exclude all the doubts, we calculated all the roots in the active space. We have mixed the maximum number of spin-free state which was possible with our hardware (all from 21 sextets, 128 from 224 quadruplets, 130 from 490 doublets). Single\_Aniso program was used to obtain the **g** tensors, energy levels, magnetic axes, *et al.*, based on the above CASSCF/RASSI calculations.

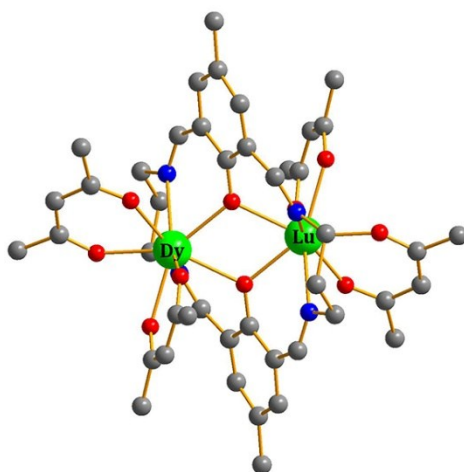

**Fig. S14** Calculated model structure of individual Dy<sup>III</sup> fragment of complex **1** (H atoms are omitted).

**Table S5** Calculated energy levels ( $\text{cm}^{-1}$ ),  $\mathbf{g}$  ( $g_x, g_y, g_z$ ) tensors and  $m_J$  values of the lowest eight Kramers doublets (KDs) of individual  $\text{Dy}^{\text{III}}$  fragment of complex **1**.

| KDs | $E/\text{cm}^{-1}$ | $\mathbf{g}$             | $m_J$      |
|-----|--------------------|--------------------------|------------|
| 1   | 0.0                | 0.026<br>0.059<br>18.738 | $\pm 15/2$ |
| 2   | 68.6               | 0.263<br>0.317<br>16.089 | $\pm 9/2$  |
| 3   | 117.5              | 0.093<br>0.562<br>12.519 | $\pm 11/2$ |
| 4   | 163.8              | 2.044<br>3.449<br>8.646  | $\pm 5/2$  |
| 5   | 203.8              | 4.036<br>5.912<br>9.736  | $\pm 3/2$  |
| 6   | 250.0              | 0.780<br>1.127<br>17.557 | $\pm 7/2$  |
| 7   | 298.7              | 0.092<br>0.192<br>19.288 | $\pm 1/2$  |
| 8   | 372.9              | 0.092<br>0.192<br>19.288 | $\pm 13/2$ |

**Table S6** Wave functions with definite projection of the total moment  $|m_J\rangle$  for the lowest two Kramers doublets (KDs) of individual  $\text{Dy}^{\text{III}}$  fragment for complex **1**.

| $E/\text{cm}^{-1}$ | wave functions                                                                                                                       |
|--------------------|--------------------------------------------------------------------------------------------------------------------------------------|
| 0.0                | $83\% \pm 15/2\rangle + 10\% \pm 11/2\rangle$                                                                                        |
| 68.6               | $15\% \pm 13/2\rangle + 25\% \pm 9/2\rangle + 18\% \pm 7/2\rangle + 16\% \pm 5/2\rangle + 13\% \pm 3/2\rangle + 10\% \pm 1/2\rangle$ |

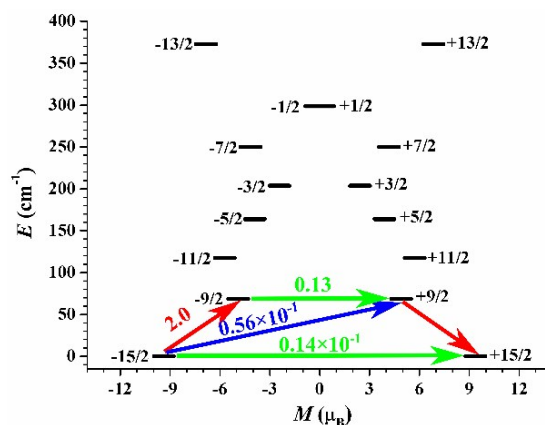

**Fig. S15** The magnetization blocking barriers in individual Dy<sup>III</sup> fragment of complex **1**. The thick black lines represent the Kramers doublets as a function of their magnetic moment along the magnetic axis. The green lines correspond to diagonal quantum tunneling of magnetization (QTM); the blue line represent off-diagonal relaxation process. The numbers at each arrow stand for the mean absolute value of the corresponding matrix element of transition magnetic moment.

To fit the exchange interaction in complex **1**, we took two steps to obtain them. Firstly, we calculated one Dy<sup>III</sup> fragment using CASSCF to obtain the corresponding magnetic properties. Then, the exchange interaction between the magnetic centers is considered within the Lines model, while the account of the dipole-dipole magnetic coupling is treated exactly. The Lines model is effective and has been successfully used widely in the research field of *f*-elements single-molecule magnets.

For complex **1**, there is only one type of *J*.

The exchange Ising Hamiltonian is:

$$H_{exch} = -J_{total} \hat{S}_{Dy1} \hat{S}_{Dy2}$$

The  $J_{total}$  is the parameter of the total magnetic interaction ( $J_{total} = J_{dipolar} + J_{exchange}$ ) between magnetic center ions. The  $\hat{S}_{Dy} = \pm 1/2$  are the ground pseudospin on the Dy<sup>III</sup> sites. The dipolar magnetic coupling can be calculated exactly, while the exchange coupling constants were fitted through comparison of the computed and measured magnetic susceptibility using the Poly\_Aniso program.

**Table S7.** Exchange energies ( $\text{cm}^{-1}$ ) and main values of the  $g_z$  for the lowest two exchange doublets of complex **1**.

|   | $E/\text{cm}^{-1}$ | $g_z$  |
|---|--------------------|--------|
| 1 | 0.0                | 37.467 |
| 2 | 1.2                | 0.000  |

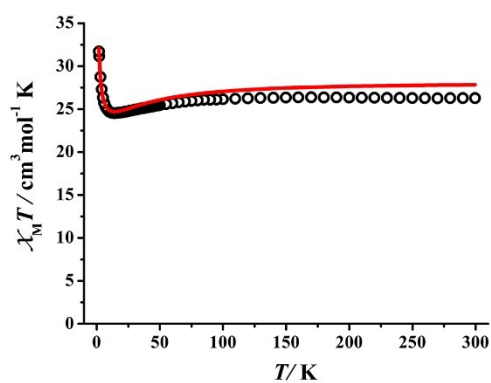

**Fig. S16** Calculated (red solid line) and experimental (circle dot) data of magnetic susceptibilities of complex **1**. The intermolecular interactions  $zJ'$  of **1** was fitted to  $0.00 \text{ cm}^{-1}$ .
